# Supplementary material for: Apoptosome Formation through Disruption of the K192-D616 Salt Bridge in the Apaf-1 Closed Form
Source: PubMed Central journal article supplement — ACS Omega. 2021 Aug 24;6(35):22551–8. doi: 10.1021/acsomega.1c02274 (PMC8427654; doi:10.1021/acsomega.1c02274), 2021-08-24
Supplement: ao1c02274_si_001.pdf [file ao1c02274_si_001.pdf]

# Supporting Information for

## Apoptosome formation through disruption of the K192-D616 salt bridge in the Apaf-1 closed form.

*Fatemeh Sahebazzamani<sup>1</sup>, Saman Hosseinkhani<sup>1\*</sup>, Leif A. Eriksson<sup>2</sup>, Howard O. Fearnhead<sup>3</sup>*

### AUTHOR ADDRESS

1: Department of Biochemistry, Faculty of Biological Sciences, Tarbiat Modares University.

Tehran, Iran.

2: Department of Chemistry and Molecular Biology, University of Gothenburg, 405 30

Göteborg, Sweden.

3: Pharmacology and Therapeutics, School of Medicine, NUI Galway. Galway, Ireland.

This PDF file includes:

Figures S1 to S2

Table S1

SI References

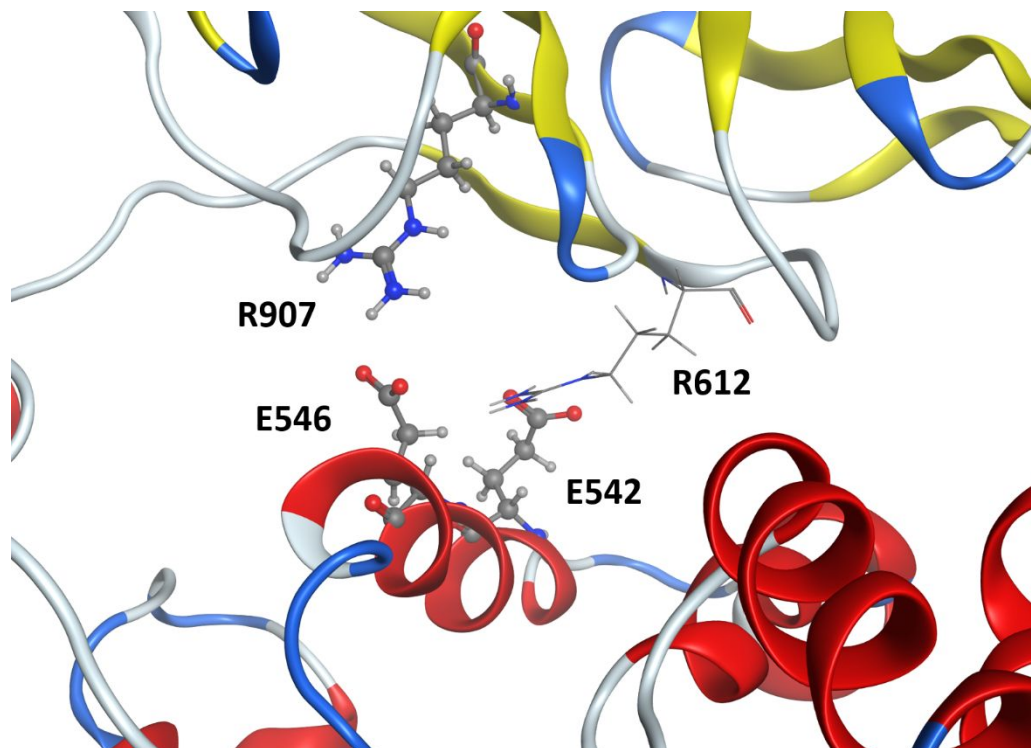

**Figure S1.** Interaction between E564 and E542 of the NBD-HD1 region and R612 and R907 in WD1 of the inactive (closed) form of Apaf-1<sub>1</sub>. R612 shown in stick model; other residues as ball-and-stick.

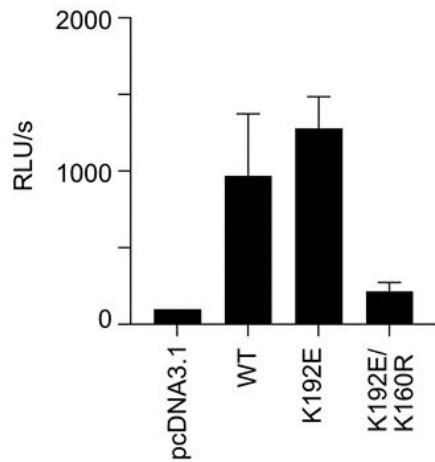

**Figure S2.** Determination of apoptosome formation by live cell luminescence assay. Transfected cells (equal numbers of cells per well) were incubated with a cell permeant luciferase substrate and luminescence assessed. (N=3, mean  $\pm$  SD).

**Table S1.** (A) The used primers for mutagenesis and (B) the converted codons.

| <b>Primers List</b>   | <b>Primers Sequence</b>                |
|-----------------------|----------------------------------------|
| Forward. E41K Ap      | ACAATATCAGAAGAGAAAAAAGTAAGAAATGAGCCCAC |
| Reverse. E41K Ap      | GTGGGCTCATTTCTTACTTTTTTCTCTTCTGATATTGT |
| Forward. K81G+D82R Ap | CTACATGAAGGATATGGAAGGCTTGCTGCCCTTCTC   |
| Reverse. K81G+D82R Ap | GAGAAGGGCAGCAAGCCTTCCATATCCTTCATGTAG   |
| Forward. K160R AP*    | GAATGGCAGGCTGTGGGAGGTCTGTATTAGCTGCAG   |
| Reverse. K160R Ap*    | CTGCAGCTAATACAGACCTCCCACAGCCTGCCATTC   |

|                  |                                   |
|------------------|-----------------------------------|
| Forward.K192E.Ap | GTTGGGAAACAAGACGAATCTGGGCTTCTGATG |
| Reverse.K192E.Ap | CATCAGAAGCCCAGATTCGTCTTGTTTCCCAAC |
| Forward.D616A.Ap | GTCCGCCCCCACACAGCTGCTGTTTACCATGC  |
| Reverse.D616A.Ap | GCATGGTAAACAGCAGCTGTGTGGGGGCGGAC  |
| Forward D616K Ap | GTCCGCCCCCACACAAAGGCTGTTTACCATGC  |
| Reverse D616K Ap | GCATGGTAAACAGCCTTTGTGTGGGGGCGGAC  |

*\*Previously designed for another study 2.*

| <b>B. Mutation</b> | <b>Converted codon(s)</b> |
|--------------------|---------------------------|
| E41K               | GAA to AAA                |
| K81G-D82R          | AAA-GAT to GGA-AGG        |
| K160R              | AAG to AGG                |
| K192E              | AAA to GAA                |
| D616A              | GAT to GCT                |
| D616K              | GAT to AAG                |

## SI REFERENCES

1. Reubold, T. F.; Wohlgemuth, S.; Eschenburg, S. Crystal structure of full-length Apaf-1: how the death signal is relayed in the mitochondrial pathway of apoptosis. *Structure*. **2011**, *19*, 1074-1083, DOI: 10.1016/j.str.2011.05.013.
2. Noori, A.-R.; Tashakor, A.; Nikkhah, M.; Eriksson, L. A.; Hosseinkhani, S.; Fearnhead, H. O. Loss of WD2 subdomain of Apaf-1 forms an apoptosome structure which blocks activation of caspase-3 and caspase-9. *Biochimie*. **2020**, *180*, 23-29, DOI: 10.1016/j.biochi.2020.10.013.
